# Supplementary material for: The behavior of Broad-tailed hummingbirds is altered by cycles of human activity in a forested area converted into agricultural land
Source: PeerJ. 2023 Feb 28;11:e14953. doi: 10.7717/peerj.14953 (PMC9983423; doi:10.7717/peerj.14953)
Supplement: Supplemental Information 2 — These human activities were used for statistical analysis to compare their frequencies on weekdays and weekends. [file peerj-11-14953-s002.xlsx]

## Sheet: Hoja1
Territory	Type	Pedestrian and cyclists	Dogs and farm animals	Vehicles
1	Weekend	5	4	2
1	Weekend	7	6	3
1	Weekend	9	4	3
1	Weekday	17	16	11
1	Weekday	20	17	10
1	Weekday	23	18	12
2	Weekend	3	3	2
2	Weekend	4	4	3
2	Weekend	2	2	1
2	Weekday	23	17	12
2	Weekday	19	18	10
2	Weekday	20	16	12
3	Weekend	5	3	1
3	Weekend	3	5	2
3	Weekend	2	2	1
3	Weekday	16	12	9
3	Weekday	18	14	10
3	Weekday	21	16	11
4	Weekend	7	5	2
4	Weekend	5	7	3
4	Weekend	6	2	1
4	Weekday	18	18	12
4	Weekday	17	12	11
4	Weekday	20	15	11
5	Weekend	5	4	2
5	Weekend	6	6	3
5	Weekend	7	3	1
5	Weekday	23	19	12
5	Weekday	24	17	13
5	Weekday	21	18	11
6	Weekend	7	6	1
6	Weekend	8	4	2
6	Weekend	9	3	1
6	Weekday	19	12	12
6	Weekday	25	11	11
6	Weekday	20	13	11
7	Weekend	4	4	2
7	Weekend	6	2	2
7	Weekend	9	4	1
7	Weekday	23	17	10
7	Weekday	19	19	11
7	Weekday	20	18	11
8	Weekend	10	5	2
8	Weekend	5	3	3
8	Weekend	3	6	2
8	Weekday	20	18	9
8	Weekday	18	16	12
8	Weekday	16	16	11
9	Weekend	4	4	2
9	Weekend	5	6	1
9	Weekend	3	5	1
9	Weekday	26	17	12
9	Weekday	25	12	11
9	Weekday	24	11	12
10	Weekend	3	3	4
10	Weekend	6	2	4
10	Weekend	4	4	2
10	Weekday	17	17	12
10	Weekday	18	19	12
10	Weekday	19	12	13
11	Weekend	4	2	2
11	Weekend	6	3	3
11	Weekend	5	1	1
11	Weekday	20	15	12
11	Weekday	16	18	12
11	Weekday	19	14	13
12	Weekend	4	3	1
12	Weekend	6	5	1
12	Weekend	7	3	1
12	Weekday	21	12	12
12	Weekday	20	13	10
12	Weekday	21	11	9
13	Weekend	4	3	1
13	Weekend	6	4	2
13	Weekend	8	7	1
13	Weekday	20	15	12
13	Weekday	19	11	12
13	Weekday	19	17	13
14	Weekend	4	4	1
14	Weekend	7	2	2
14	Weekend	3	6	1
14	Weekday	23	12	12
14	Weekday	18	11	10
14	Weekday	15	10	9
15	Weekend	6	2	2
15	Weekend	5	6	3
15	Weekend	7	3	2
15	Weekday	21	16	12
15	Weekday	20	17	12
15	Weekday	20	18	13
16	Weekend	3	4	2
16	Weekend	4	2	3
16	Weekend	2	7	1
16	Weekday	21	19	12
16	Weekday	21	18	12
16	Weekday	20	19	13
17	Weekend	5	2	2
17	Weekend	7	5	2
17	Weekend	9	1	2
17	Weekday	21	11	12
17	Weekday	15	15	13
17	Weekday	19	14	11
18	Weekend	8	4	2
18	Weekend	5	6	2
18	Weekend	3	3	2
18	Weekday	23	15	12
18	Weekday	20	17	13
18	Weekday	16	12	12
19	Weekend	4	6	2
19	Weekend	3	3	2
19	Weekend	7	5	1
19	Weekday	25	15	10
19	Weekday	20	13	10
19	Weekday	20	17	9
20	Weekend	6	2	1
20	Weekend	5	3	1
20	Weekend	6	2	1
20	Weekday	21	12	12
20	Weekday	20	13	11
20	Weekday	24	14	11
21	Weekend	3	4	1
21	Weekend	2	5	2
21	Weekend	4	4	3
21	Weekday	23	13	12
21	Weekday	21	11	12
21	Weekday	20	19	11
