# Supplementary material for: The behavior of Broad-tailed hummingbirds is altered by cycles of human activity in a forested area converted into agricultural land
Source: PeerJ. 2023 Feb 28;11:e14953. doi: 10.7717/peerj.14953 (PMC9983423; doi:10.7717/peerj.14953)
Supplement: Supplemental Information 4 — These behaviors were used for statistical analysis to compare their frequencies on weekdays and weekends. [file peerj-11-14953-s004.xlsx]

## Sheet: Hoja1
Territory	Type	Chases	Flowers visited	Successful intruders	Territory size	Total number of flowers
1	Weekend	10	43	1	1790	1415
1	Weekend	17	38	0	1790	1390
1	Weekend	7	31	3	1790	1200
1	Weekday	1	12	24	1790	1370
1	Weekday	4	21	21	1790	1300
1	Weekday	0	18	19	1790	1376
2	Weekend	13	45	4	3740	8295
2	Weekend	28	39	6	3740	7459
2	Weekend	10	28	2	3740	7956
2	Weekday	1	9	38	3740	8112
2	Weekday	4	12	21	3740	7932
2	Weekday	1	14	27	3740	7417
3	Weekend	10	27	0	1984	5958
3	Weekend	13	30	2	1984	5128
3	Weekend	12	42	7	1984	4951
3	Weekday	6	12	25	1984	5299
3	Weekday	5	13	30	1984	4819
3	Weekday	7	19	16	1984	4708
4	Weekend	13	44	5	2786	5102
4	Weekend	17	45	3	2786	4816
4	Weekend	10	37	7	2786	4519
4	Weekday	6	10	21	2786	4198
4	Weekday	6	12	19	2786	3998
4	Weekday	1	19	30	2786	4104
5	Weekend	28	49	0	1136	1651
5	Weekend	17	52	6	1136	1521
5	Weekend	10	38	8	1136	1400
5	Weekday	2	17	21	1136	1382
5	Weekday	0	18	25	1136	1027
5	Weekday	3	19	30	1136	1289
6	Weekend	13	44	5	2070	860
6	Weekend	10	50	0	2070	812
6	Weekend	10	39	9	2070	782
6	Weekday	1	12	24	2070	842
6	Weekday	0	10	31	2070	731
6	Weekday	3	17	26	2070	694
7	Weekend	16	53	7	3893	3440
7	Weekend	17	44	3	3893	3017
7	Weekend	16	40	9	3893	2941
7	Weekday	5	17	21	3893	2189
7	Weekday	3	15	26	3893	2993
7	Weekday	0	10	17	3893	2013
8	Weekend	28	34	0	2007	5584
8	Weekend	12	39	8	2007	5023
8	Weekend	17	44	6	2007	4817
8	Weekday	3	19	21	2007	5119
8	Weekday	4	17	23	2007	4028
8	Weekday	2	18	15	2007	3913
9	Weekend	12	44	8	5306	6080
9	Weekend	10	52	0	5306	5419
9	Weekend	28	39	4	5306	4921
9	Weekday	1	12	19	5306	5826
9	Weekday	3	10	21	5306	3982
9	Weekday	3	14	23	5306	3172
10	Weekend	10	40	6	1687	1000
10	Weekend	12	37	4	1687	831
10	Weekend	17	38	8	1687	721
10	Weekday	2	10	23	1687	939
10	Weekday	3	8	30	1687	549
10	Weekday	7	12	21	1687	671
11	Weekend	17	42	6	3203	5634
11	Weekend	16	36	9	3203	5192
11	Weekend	28	41	4	3203	4728
11	Weekday	3	12	23	3203	3928
11	Weekday	0	13	24	3203	4729
11	Weekday	5	14	20	3203	5018
12	Weekend	12	44	3	3245	1497
12	Weekend	17	45	0	3245	1394
12	Weekend	16	41	7	3245	1202
12	Weekday	2	12	34	3245	1365
12	Weekday	3	18	38	3245	1292
12	Weekday	1	14	21	3245	1328
13	Weekend	28	37	8	2125	2087
13	Weekend	12	39	6	2125	1932
13	Weekend	10	40	9	2125	1592
13	Weekday	3	12	23	2125	1675
13	Weekday	2	12	19	2125	1238
13	Weekday	1	17	20	2125	1539
14	Weekend	17	35	4	1307	4030
14	Weekend	28	30	0	1307	3729
14	Weekend	10	44	8	1307	3016
14	Weekday	2	12	20	1307	3678
14	Weekday	5	12	21	1307	2992
14	Weekday	2	13	24	1307	3019
15	Weekend	28	43	6	1547	2026
15	Weekend	14	35	5	1547	1839
15	Weekend	12	39	9	1547	1203
15	Weekday	3	20	19	1547	1472
15	Weekday	4	21	30	1547	1196
15	Weekday	2	15	24	1547	1673
16	Weekend	17	47	0	4097	760
16	Weekend	12	51	8	4097	831
16	Weekend	10	44	6	4097	459
16	Weekday	4	10	21	4097	582
16	Weekday	3	12	20	4097	781
16	Weekday	5	18	31	4097	602
17	Weekend	10	40	4	2953	483
17	Weekend	14	41	3	2953	372
17	Weekend	12	43	8	2953	405
17	Weekday	3	20	21	2953	328
17	Weekday	5	12	20	2953	298
17	Weekday	6	17	19	2953	338
18	Weekend	28	34	5	1452	2722
18	Weekend	12	31	3	1452	2068
18	Weekend	17	50	7	1452	2785
18	Weekday	2	12	20	1452	3012
18	Weekday	6	14	21	1452	2629
18	Weekday	4	18	31	1452	2031
19	Weekend	28	39	5	2320	417
19	Weekend	12	44	3	2320	401
19	Weekend	10	34	0	2320	328
19	Weekday	3	12	23	2320	297
19	Weekday	2	15	31	2320	378
19	Weekday	4	21	27	2320	428
20	Weekend	28	50	6	1158	1381
20	Weekend	12	46	5	1158	1262
20	Weekend	10	38	3	1158	1098
20	Weekday	2	12	23	1158	1378
20	Weekday	3	14	21	1158	1136
20	Weekday	2	10	30	1158	1028
21	Weekend	12	34	7	1133	950
21	Weekend	10	41	5	1133	862
21	Weekend	17	50	8	1133	717
21	Weekday	4	12	23	1133	902
21	Weekday	2	17	24	1133	689
21	Weekday	0	19	29	1133	724
